# Supplementary material for: Using Porcine Jejunum Ex Vivo to Study Absorption and Biotransformation of Natural Products in Plant Extracts: Pueraria lobata as a Case Study
Source: MDPI journal article supplement (doi:10.3390/metabo11080541), 2021-08-14
Supplement: s1 [file s1]

## Supplementary Material

### Using porcine jejunum *ex vivo* to study absorption and biotransformation of natural products in plant extracts: *Pueraria lobata* as a case study

Joëlle Houriet<sup>1, 2</sup>, Yvonne E. Arnold<sup>1, 2</sup>, Léonie Pellissier<sup>1, 2</sup>, Yogeshvar N. Kalia<sup>1, 2</sup> and Jean-Luc Wolfender<sup>1, 2\*</sup>

<sup>1</sup> School of Pharmaceutical Sciences, University of Geneva, CMU, rue Michel-Servet 1, 1211 Geneva, Switzerland

<sup>2</sup> Institute of Pharmaceutical Sciences of Western Switzerland, University of Geneva, CMU, rue Michel-Servet 1, 1211 Geneva 4, Switzerland

\* Correspondence: jean-luc.wolfender@unige.ch

#### Table of Contents

|   |                                                                               |    |
|---|-------------------------------------------------------------------------------|----|
| 1 | Feature based molecular network of PLRE.....                                  | 2  |
| 2 | Semi-quantitative peak ratios from UHPLC-HRMS data processing.....            | 5  |
| 3 | Quantitative results for PLRE .....                                           | 9  |
| 4 | Quantitative results for puerarin and daidzin standard.....                   | 11 |
| 5 | Data processing of the metabolite profiling.....                              | 12 |
| 6 | Acquisition of the untargeted UHPLC-HRMS/MS metabolite profiling of PLRE..... | 13 |
| 7 | MZmine parameters for peak picking .....                                      | 14 |
| 8 | Acquisition of the quantitative analyses .....                                | 15 |

## 1 Feature based molecular network of PLRE

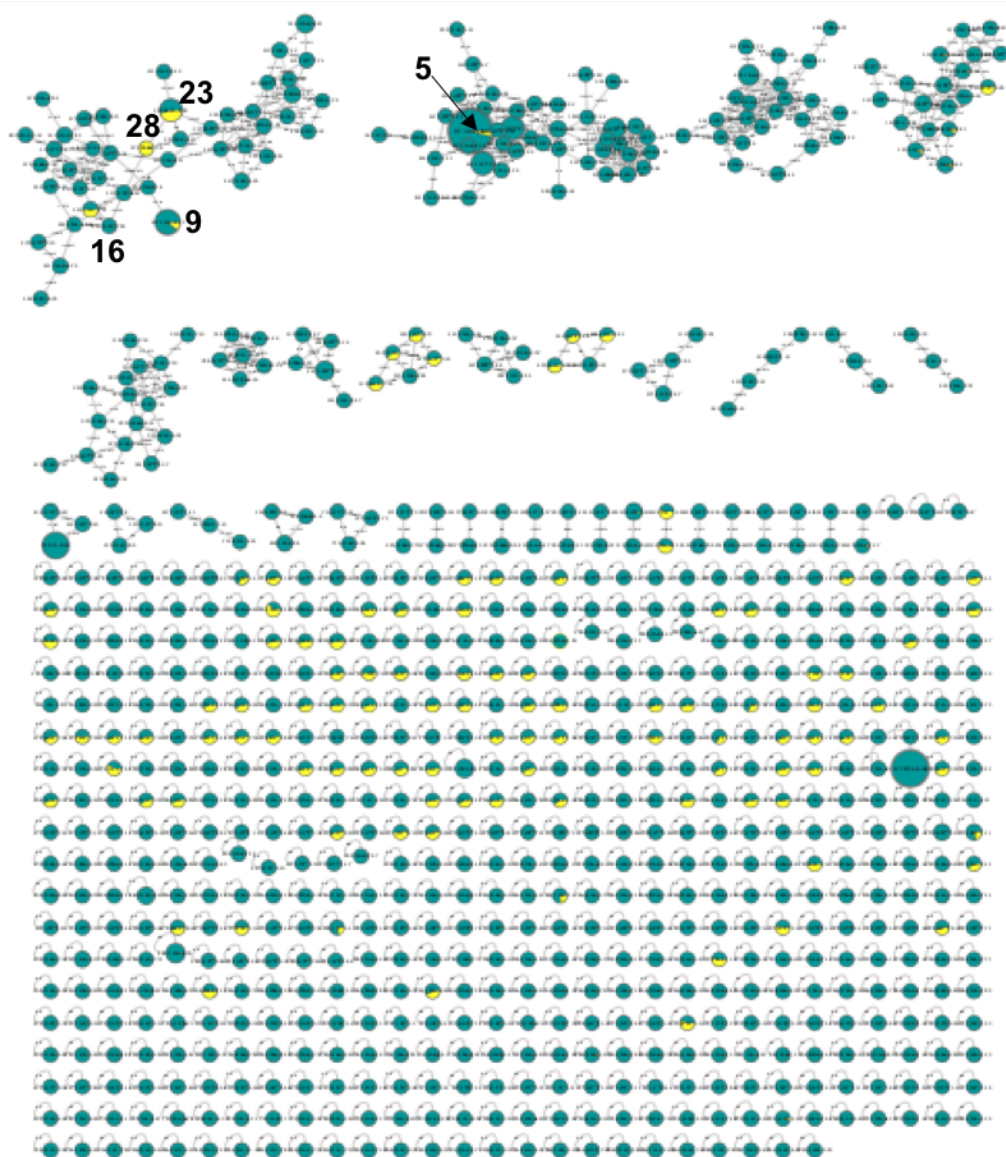

**Supplementary Figure S1.** Feature-based molecular network (FBMN) of the freeze-dried decoction of *Pueraria lobata* roots (PLRE) at 5 mg/mL, resulting from the data processing of UHPLC-HRMS/MS analyses (section 4.8). In blue-green, peaks detected in PLRE, in yellow, peaks detected in the solution of five standards. The numbers highlight the peaks of the five standards (table 1).

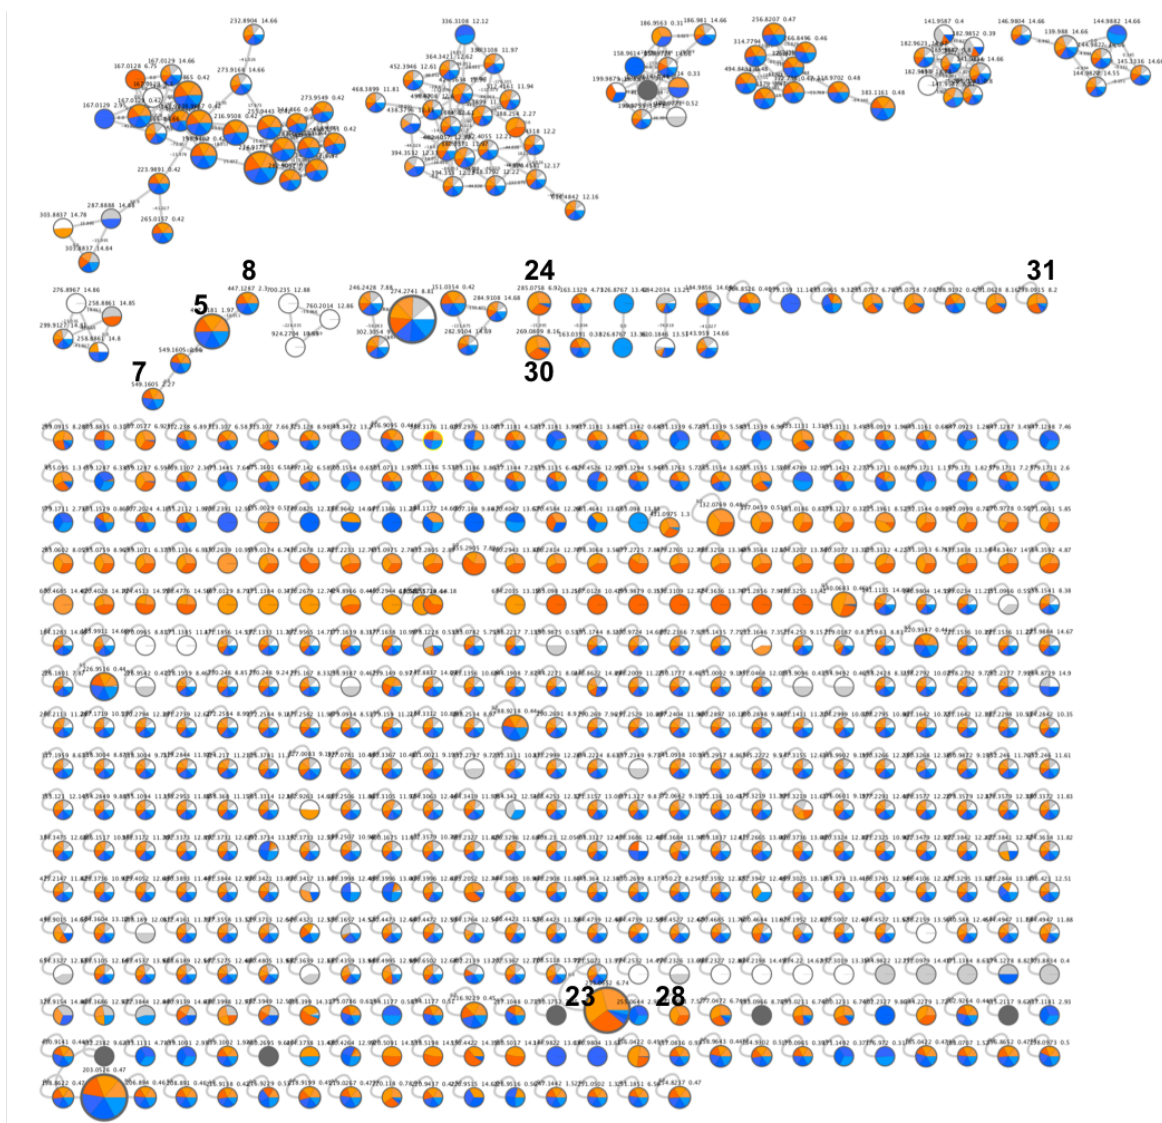

**Supplementary Figure S2.** Feature-based molecular network obtained with the untargeted UHPLC-HRMS/MS analyses of permeation experiment (section 4.8). The data result from the processing of the analyses, comparing PLRE at 200  $\mu\text{g/mL}$  at 0 min (blue tones) and at 100 min (orange tones). Blank solutions are represented in white and grey. Node size represents the peak height intensity in the donor at 100 min. The numbers indicated the peaks detected in the membrane (table 1).

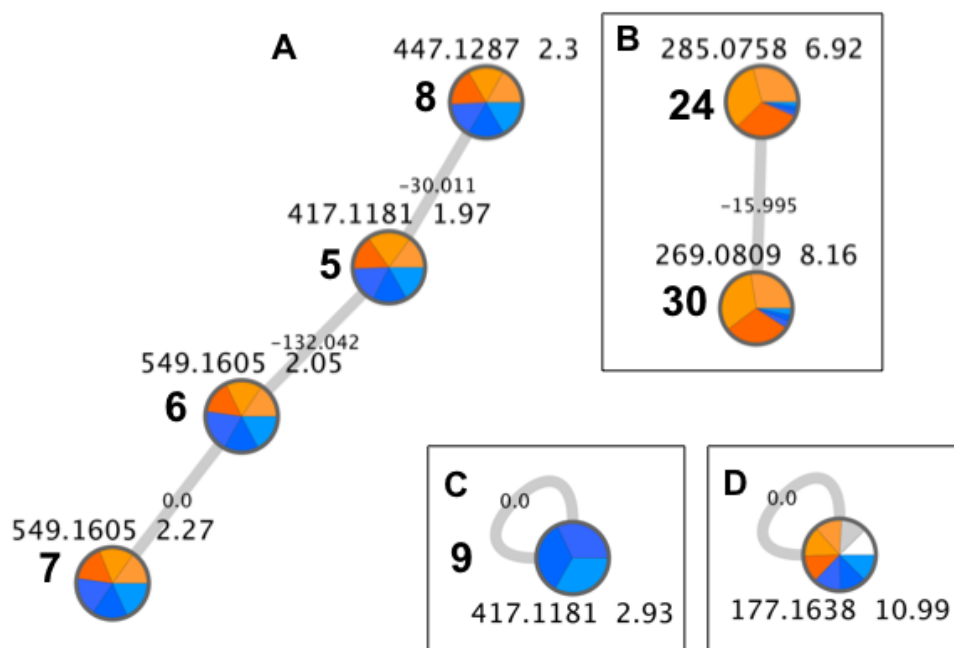

**Supplementary Figure S3.** Examples of visualization in the FBMN of different behaviors of PLRE constituents in the presence of jejunum. The data result from the processing of untargeted UHPLC-HRMS/MS analyses after the permeation experiment, comparing PLRE at 200  $\mu\text{g/mL}$  at 0 min (blue tones) and at 100 min (orange tones) (section 4.8). Blank solutions are represented in white and grey. Each node is labelled with its  $m/z$  and retention time data, each edge with the  $m/z$  difference between the two connected nodes. Arbitrary node size. A: the peaks are stable, B: the peaks increased in donor compartment, C: the peak disappeared in donor compartment, D: UHPLC-HRMS contamination. The numbers referred to table 1.

2     Semi-quantitative peak ratios from UHPLC-HRMS data processing

**Table S1:** Semi-quantitative ratio calculated between the average intensity of the peak heights in the acceptor at T<sub>100 min</sub> and donor compartments at T<sub>0 min</sub> (stock solution) and at T<sub>100 min</sub> (equations 1 and 2) (targeted deconvolution):

| N° | m/z [M+H] <sup>+</sup> | RT <sup>a</sup> (min) | Annotation | Acc <sup>b</sup> /T <sub>0min</sub> | Ratio                                     | Acceptor at T <sub>100 min</sub> |         |   |       | Stock solution at T <sub>0 min</sub> |         |   |      | Donor at T <sub>100min</sub> |         |   |       |
|----|------------------------|-----------------------|------------|-------------------------------------|-------------------------------------------|----------------------------------|---------|---|-------|--------------------------------------|---------|---|------|------------------------------|---------|---|-------|
|    |                        |                       |            |                                     | Acc <sup>b</sup> /T <sub>DON100 min</sub> | Average                          | SD      | N | CV    | Average                              | SD      | N | CV   | Average                      | SD      | N | CV    |
| 5  | 417.1180               | 1.97                  | puerarin   | 0.10%                               | 0.10%                                     | 2.4E+04                          | 4.1E+03 | 3 | 17.0% | 2.5E+07                              | 3.3E+05 | 3 | 1.3% | 2.5E+07                      | 2.5E+06 | 4 | 10.0% |

<sup>a</sup> Retention time, <sup>b</sup> Acceptor

**Table S2:** Semi-quantitative ratios calculated between the average intensity of the peak heights in the extracted membranes and donor compartments at T<sub>0 min</sub> (stock solution) (equation 3) (targeted deconvolution):

| N° | m/z [M+H] <sup>+</sup> | RT <sup>a</sup> (min) | Annotation         | Ratio M <sup>b</sup> /T <sub>0 min</sub> | Extracted membrane |         |   |       | Stock solution at T <sub>0 min</sub> |         |   |      |
|----|------------------------|-----------------------|--------------------|------------------------------------------|--------------------|---------|---|-------|--------------------------------------|---------|---|------|
|    |                        |                       |                    |                                          | Average            | SD      | N | CV    | Average                              | SD      | N | CV   |
| 5  | 417.1180               | 1.97                  | puerarin           | 0.5%                                     | 1.2E+05            | 1.6E+04 | 4 | 13.6% | 2.5E+07                              | 3.3E+05 | 3 | 1.3% |
| 7  | 549.1605               | 2.27                  | 6"-xylo-puerarin   | 0.3%                                     | 9.8E+03            | 1.5E+03 | 4 | 15.5% | 3.4E+06                              | 2.4E+05 | 3 | 6.8% |
| 8  | 447.1286               | 2.30                  | 3'-methoxypuerarin | 0.6%                                     | 2.4E+04            | 4.0E+03 | 4 | 16.2% | 4.4E+06                              | 2.6E+05 | 3 | 5.8% |
| 23 | 255.0652               | 6.74                  | daidzein           | 13.4%                                    | 6.1E+05            | 1.9E+05 | 4 | 30.4% | 4.6E+06                              | 1.7E+05 | 3 | 3.6% |
| 28 | 271.0602               | 7.51                  | genistein          | 116.3%                                   | 2.4E+04            | 2.8E+03 | 4 | 11.8% | 2.1E+04                              | 7.6E+02 | 3 | 3.7% |

<sup>a</sup> RT: Retention time, <sup>b</sup> M: extracted membrane

**Table S3:** Semi-quantitative ratios calculated between the average intensity of the UHPLC-HRMS peak heights of extracted membranes and donor compartments at  $T_{100\text{ min}}$  (equation 4) (targeted deconvolution):

| N° | $m/z$ [M+H] <sup>+</sup> | RT <sup>a</sup> (min) | Annotation         | Ratio<br>M <sup>b</sup> /T <sub>DON100min</sub> | Extracted membrane |         |   |       | Donor at T <sub>100min</sub> |         |   |       |
|----|--------------------------|-----------------------|--------------------|-------------------------------------------------|--------------------|---------|---|-------|------------------------------|---------|---|-------|
|    |                          |                       |                    |                                                 | Average            | SD      | N | CV    | Average                      | SD      | N | CV    |
| 5  | 417.1180                 | 1.97                  | puerarin           | 0.5%                                            | 1.2E+05            | 1.6E+04 | 4 | 13.6% | 2.5E+07                      | 2.5E+06 | 4 | 10.0% |
| 7  | 549.1605                 | 2.27                  | 6"-xylo-puerarin   | 0.3%                                            | 9.8E+03            | 1.5E+03 | 4 | 15.5% | 3.4E+06                      | 2.4E+05 | 4 | 6.8%  |
| 8  | 447.1286                 | 2.30                  | 3'-methoxypuerarin | 0.6%                                            | 2.4E+04            | 4.0E+03 | 4 | 16.2% | 4.3E+06                      | 1.3E+05 | 4 | 3.1%  |
| 23 | 255.0652                 | 6.74                  | daidzein           | 1.7%                                            | 6.1E+05            | 1.9E+05 | 4 | 30.4% | 3.5E+07                      | 2.6E+06 | 4 | 7.3%  |
| 24 | 285.0759                 | 6.93                  | 3'-methoxydaidzein | 0.7%                                            | 4.1E+04            | 1.4E+04 | 4 | 34.5% | 5.8E+06                      | 2.2E+05 | 4 | 3.8%  |
| 28 | 271.0602                 | 7.51                  | genistein          | 3.1%                                            | 2.4E+04            | 2.8E+03 | 4 | 11.8% | 7.7E+05                      | 3.3E+04 | 4 | 4.2%  |
| 30 | 269.0810                 | 8.16                  | formononetin       | 3.0%                                            | 2.4E+05            | 5.6E+04 | 4 | 23.1% | 8.0E+06                      | 2.8E+05 | 4 | 3.5%  |
| 31 | 299.0918                 | 8.20                  | tithonin           | 3.7%                                            | 2.1E+04            | 3.6E+03 | 4 | 17.6% | 5.6E+05                      | 4.0E+04 | 4 | 7.2%  |
| 32 | 285.0761                 | 8.96                  | biochanin A        | 9.0%                                            | 1.4E+04            | 3.6E+03 | 4 | 26.2% | 1.5E+05                      | 8.0E+03 | 4 | 5.2%  |

<sup>a</sup> RT: Retention time, <sup>b</sup> M: extracted membrane

**Table S4:** Semi-quantitative ratios calculated between the intensity average of the UHPLC-HRMS peak heights of donor compartments at T<sub>100 min</sub> and at T<sub>0min</sub> (stock solution) (equation 5):

| n° | m/z [M+H] <sup>+</sup> | RT <sup>a</sup> (min) | Annotation               | Ratio T <sub>DON100 min</sub> /T <sub>0</sub> <sup>b</sup> | Stock solution at T <sub>0min</sub> |         |    |      | Donor at T <sub>100 min</sub> |         |    |        |
|----|------------------------|-----------------------|--------------------------|------------------------------------------------------------|-------------------------------------|---------|----|------|-------------------------------|---------|----|--------|
|    |                        |                       |                          |                                                            | Average                             | SD      | N  | CV   | Average                       | SD      | N  | CV     |
| 1  | 579.1711               | 0.86                  | puerarin-6''-O-glucoside | 85.9%                                                      | 5.4E+05                             | 1.4E+04 | 3  | 2.6% | 4.7E+05                       | 4.4E+04 | 4  | 9.5%   |
| 2  | 579.1711               | 1.10                  | daidzin-4''-glucoside    | 0.0%                                                       | 3.5E+05                             | 2.8E+04 | 3  | 8.1% | 0                             | NA      | NA | NA     |
| 3  | 433.1131               | 1.30                  | 3'-hydroxypuerarin       | 209.2%                                                     | 1.2E+06                             | 1.9E+04 | 3  | 1.6% | 2.5E+06                       | 4.0E+04 | 4  | 1.6%   |
| 4  | 565.1554               | 1.52                  | genistein-8-C-apiside    | 196.7%                                                     | 9.3E+04                             | 1.6E+03 | 3  | 1.7% | 1.8E+05                       | 1.2E+04 | 4  | 6.5%   |
| 5  | 417.1183               | 1.97                  | puerarin                 | 100.4%                                                     | 2.5E+07                             | 3.3E+05 | 3  | 1.3% | 2.5E+07                       | 2.5E+06 | 4  | 10.0%  |
| 6  | 549.1605               | 2.05                  | mirificin                | 97.6%                                                      | 9.8E+05                             | 5.6E+04 | 3  | 5.7% | 9.5E+05                       | 2.3E+04 | 4  | 2.4%   |
| 7  | 549.1604               | 2.27                  | 6''-xylo-puerarin        | 92.6%                                                      | 3.7E+06                             | 1.4E+05 | 3  | 3.7% | 3.4E+06                       | 2.4E+05 | 4  | 6.8%   |
| 8  | 447.1287               | 2.30                  | 3'-methoxypuerarin       | 96.9%                                                      | 4.4E+06                             | 2.6E+05 | 3  | 5.8% | 4.3E+06                       | 1.3E+05 | 4  | 3.1%   |
| 9  | 417.1181               | 2.94                  | daidzin                  | 0.8%                                                       | 5.9E+06                             | 1.6E+05 | 3  | 2.7% | 4.7E+04                       | 9.5E+04 | 4  | 200.0% |
| 10 | 447.1287               | 3.45                  | 3'-methoxydaidzin        | 0.0%                                                       | 6.4E+05                             | 1.8E+04 | 3  | 2.8% | 0                             | NA      | NA | NA     |
| 11 | 433.1131               | 3.46                  | genistein-8-C-glucoside  | 106.2%                                                     | 1.1E+05                             | 1.7E+03 | 3  | 1.5% | 1.2E+05                       | 1.7E+03 | 4  | 1.5%   |
| 12 | 417.1181               | 3.89                  | neopuerarin A            | 93.4%                                                      | 1.7E+05                             | 1.8E+03 | 3  | 1.1% | 1.6E+05                       | 1.2E+04 | 4  | 7.3%   |
| 13 | 417.1181               | 4.00                  | daidzein-4'-glucoside    | 20.9%                                                      | 1.8E+05                             | 5.6E+03 | 3  | 3.1% | 3.8E+04                       | 7.6E+04 | 4  | 200.0% |
| 14 | 607.2024               | 4.11                  | pueroside A              | 89.7%                                                      | 1.3E+05                             | 2.0E+03 | 3  | 1.5% | 1.2E+05                       | 7.3E+03 | 4  | 6.1%   |
| 15 | 417.1181               | 4.53                  | neopuerarin B            | 98.0%                                                      | 1.4E+05                             | 2.3E+03 | 3  | 1.7% | 1.3E+05                       | 6.0E+03 | 4  | 4.5%   |
| 16 | 433.1131               | 4.71                  | genistin                 | 0.0%                                                       | 3.4E+05                             | 1.2E+04 | 3  | 3.4% | 0                             | NA      | NA | NA     |
| 17 | 503.1186               | 5.53                  | 6''-O-malonyl-daidzin    | 85.0%                                                      | 1.1E+06                             | 8.7E+04 | 3  | 8.0% | 9.3E+05                       | 5.7E+04 | 4  | 6.1%   |
| 18 | 271.0601               | 5.86                  | 8-hydroxydaidzein        | NA                                                         | ND                                  | ND      | NA | NA   | 2.9E+05                       | 1.5E+04 | 4  | 5.4%   |
| 19 | 459.1286               | 6.33                  | 6''-O-acetyldaizdin      | 6.5%                                                       | 9.1E+05                             | 5.8E+04 | 3  | 6.3% | 5.9E+04                       | 7.3E+04 | 4  | 123.7% |
| 20 | 519.1135               | 6.48                  | 6''-malonylgenistin      | 83.4%                                                      | 2.4E+05                             | 3.7E+03 | 3  | 1.5% | 2.0E+05                       | 1.2E+04 | 4  | 6.1%   |
| 21 | 475.1601               | 6.58                  | pueroside D              | 106.2%                                                     | 1.4E+06                             | 7.5E+04 | 3  | 5.3% | 1.5E+06                       | 1.5E+05 | 4  | 9.9%   |
| 22 | 431.1338               | 6.73                  | ononin or isomer         | 0.0%                                                       | 2.0E+06                             | 6.2E+04 | 3  | 3.0% | 0                             | NA      | NA | NA     |
| 23 | 255.0652               | 6.74                  | daidzein                 | 774.5%                                                     | 4.6E+06                             | 1.7E+05 | 3  | 3.6% | 3.5E+07                       | 2.6E+06 | 4  | 7.3%   |
| 24 | 285.0758               | 6.93                  | 3'-methoxydaidzein       | 1456.5%                                                    | 4.0E+05                             | 1.2E+04 | 3  | 2.9% | 5.8E+06                       | 2.2E+05 | 4  | 3.8%   |
| 25 | 431.1338               | 6.96                  | ononin or isomer         | 0.0%                                                       | 2.1E+05                             | 1.1E+04 | 3  | 5.3% | 0                             | NA      | NA | NA     |

|    |          |      |              |                     |         |         |   |      |         |         |    |       |
|----|----------|------|--------------|---------------------|---------|---------|---|------|---------|---------|----|-------|
| 26 | 285.0757 | 7.08 | kakkatin     | NA                  | ND      | NA      | 3 | NA   | 4.8E+05 | 2.0E+04 | 4  | 4.3%  |
| 27 | 447.1288 | 7.46 | sissotrin    | 0.0%                | 1.0E+05 | 3.3E+03 | 3 | 3.2% | 0       | NA      | NA | NA    |
| 28 | 271.0601 | 7.50 | genistein    | 3736% <sup>td</sup> | 2.1E+04 | 7.6E+02 | 3 | 3.7% | 7.7E+05 | 3.3E+04 | 4  | 4.2%  |
| 29 | 313.1070 | 7.66 | puerol B     | NA                  | ND      | NA      | 3 | NA   | 1.6E+05 | 2.1E+04 | 4  | 13.3% |
| 30 | 269.0809 | 8.16 | formononetin | 1033.4%             | 7.7E+05 | 3.1E+04 | 3 | 4.0% | 8.0E+06 | 2.8E+05 | 4  | 3.5%  |
| 31 | 299.0915 | 8.20 | tithonin     | 422.2%              | 1.3E+05 | 2.8E+03 | 3 | 2.2% | 5.6E+05 | 4.0E+04 | 4  | 7.2%  |
| 32 | 285.0759 | 8.96 | biochanin A  | NA                  | ND      | NA      | 3 | NA   | 1.5E+05 | 8.0E+03 | 4  | 5.2%  |

<sup>a</sup> RT: Retention time, <sup>b</sup>  $T_{100}/T_0$  ratio between the average intensity of peak height in donor compartment at  $T_{100 \text{ min}}$  and  $T_{0 \text{ min}}$

<sup>td</sup>: peak height intensities obtained by targeted deconvolution (td) and verified with LOQ measurement. ND: non detected; NA: non adapted



### 3 Quantitative results for PLRE

**Table S5:** Measured concentration in PLRE of five constituents at  $T_{0\text{ min}}$  (stock solution) and in the donor compartments at  $T_{100\text{ min}}$

| Substance | Stock solution at $T_{0\text{ min}}$   | Donor at $T_{100\text{ min}}$         |
|-----------|----------------------------------------|---------------------------------------|
|           | Concentration $\pm$ SD (CV) (n=3)      | Concentration $\pm$ SD (CV) (n=5)     |
| Puerarin  | $25.724 \pm 0.288 \mu\text{M}$ (1.12%) | $29.574 \pm 0.997 \mu\text{M}$ (3.4%) |
| Daidzin   | $5.035 \pm 39.67 \mu\text{M}$ (0.79%)  | $181 \pm 94 \text{ nM}$ (52.0%)       |
| Genistin  | $403.28 \pm 5.96 \text{ nM}$ (1.48%)   | $22 \pm 2 \text{ nM}$ (9.1%)          |
| Daidzein  | $138 \pm 3.52 \text{ nM}$ (2.54%)      | $1.544 \mu\text{M} \pm 0.197$ (12.8%) |
| Genistein | Trace amount                           | $121 \pm 15 \text{ nM}$ (12.8%)       |

**Table S6:** Measured amount of puerarin (5) in PLRE during permeation experiment

| Puerarin in PLR                       | Ratio (nmole/nmole)        | Average (nmole) | SD (nmole) | N | CV (%) |
|---------------------------------------|----------------------------|-----------------|------------|---|--------|
| Stock solution ( $T_{0\text{ min}}$ ) | -                          | 205.793         | 2.303      | 3 | 1.12   |
| Donor ( $T_{100\text{ min}}$ )        | 100.64%                    | 207.103         | 7.044      | 5 | 3.4    |
| Membrane                              | $Q_{\text{DEP}}^a$ 0.22 %  | 0.455           | 0.058      | 5 | 12.9   |
| Acceptor( $T_{100\text{ min}}$ )      | $Q_{\text{PERM}}^b$ 0.24 % | 0.499           | 0.054      | 5 | 10.8   |
| Sum                                   | 101.10%                    | 208.057         | 7.083      |   |        |

<sup>a</sup> calculated with equation 7, <sup>b</sup> calculated with equation 8

**Table S7:** Measured amount of daidzin and daidzein in PLRE during permeation experiment

| Daidzin/Daidzein in PLRE              | Average (nmole) | SD (nmole) | N | CV (%) |
|---------------------------------------|-----------------|------------|---|--------|
| <b>Daidzin</b>                        |                 |            |   |        |
| Stock solution ( $T_{0\text{ min}}$ ) | 40.278          | 0.317      | 3 | 0.79   |
| Donor ( $T_{100\text{ min}}$ )        | 1.270           | 0.660      | 5 | 52.0   |
| Membrane                              | nd              |            |   |        |
| Acceptor( $T_{100\text{ min}}$ )      | nd              |            |   |        |
| <b>Daidzein</b>                       |                 |            |   |        |
| Stock solution ( $T_{0\text{ min}}$ ) | 1.143           | 0.028      | 5 | 2.5    |
| Donor ( $T_{100\text{ min}}$ )        | 10.809          | 1.379      | 5 | 12.8   |
| Membrane                              | 0.606           | 0.074      | 5 | 12.2   |
| Acceptor( $T_{100\text{ min}}$ )      | nd              |            |   |        |
|                                       | Average (%)     | SD (%)     | N | CV (%) |
| $Q_{\text{DEP-EXTRACT}}^A$            | 5.38            | 0.96       | 5 | 17.9   |

<sup>a</sup> calculated with equation 9

**Table S8:** Measured amount of genistin and genistein in PLRE during permeation experiment

| Genistin/Genistein<br>in PLRE                          | Average (nmole)    | SD (nmole)    | N        | CV (%)        |
|--------------------------------------------------------|--------------------|---------------|----------|---------------|
| <b>Genistin</b>                                        |                    |               |          |               |
| Stock solution (T <sub>0min</sub> )                    | 3.226              | 0.048         | 3        | 1.5           |
| Donor (T <sub>100min</sub> )                           | 0.154              | 0.014         | 5        | 9.1           |
| Membrane                                               | nd                 |               |          |               |
| Acceptor(T <sub>100min</sub> )                         | nd                 |               |          |               |
| <b>Genistein</b>                                       |                    |               |          |               |
| Stock solution (T <sub>0min</sub> )                    | 1.143              | 0.028         | 5        | 2.54          |
| Donor (T <sub>100min</sub> )                           | 0.848              | 0.108         | 5        | 12.8          |
| Membrane                                               | 0.338              | 0.031         | 5        | 9.2           |
| Acceptor(T <sub>100min</sub> )                         | nd                 |               |          |               |
| Blank membranes                                        | 0.101              | 0.014         | 3        | 14.2          |
|                                                        | <b>Average (%)</b> | <b>SD (%)</b> | <b>N</b> | <b>CV (%)</b> |
| <i>Genistein Q<sub>DEP-EXTRACT</sub><sup>a,b</sup></i> | 21.63              | 3.17          | 5        | 14.6          |

<sup>a</sup>Calculated with equation 9, <sup>b</sup>Calculated by subtracting the average amount in the blank membranes.

#### 4 Quantitative results for puerarin and daidzin standard

**Table S9:** Quantification results with the standard puerarin

| Puerarin standard                        | Ratio (nmole/nmole) | Average (nmole) | SD (nmole) | N | CV (%) |
|------------------------------------------|---------------------|-----------------|------------|---|--------|
| <b>Stock solution (T<sub>0min</sub>)</b> | -                   | 765.254         | 5.590      | 3 | 0.75   |
| <b>Donor (T<sub>100min</sub>)</b>        | 90.74 %             | 729.921         | 14.484     | 4 | 2.0    |
| <b>Membrane</b>                          | $Q_{DEP}^a$ 0.47 %  | 3.813           | 0.540      | 4 | 14.2   |
| <b>Acceptor(T<sub>100min</sub>)</b>      | $Q_{PERM}^b$ 0.11 % | 0.924           | 0.098      | 4 | 10.6   |
| <b>Sum</b>                               | 91.33 %             | 734.658         | 353.441    |   |        |

<sup>a</sup> calculated with equation 7, <sup>b</sup> calculated with equation 8.

**Table S10:** Quantification results with the standard daidzin, following both daidzin and daidzein

| Daidzin standard                         | Average (nmole)         | SD (nmole) | N | CV (%) |
|------------------------------------------|-------------------------|------------|---|--------|
| <b>Daidzin</b>                           |                         |            |   |        |
| <b>Stock solution (T<sub>0min</sub>)</b> | 811.371                 | 31.181     | 3 | 3.8    |
| <b>Donor (T<sub>100min</sub>)</b>        | 341.999                 | 88.216     | 6 | 42.15  |
| <b>Membrane</b>                          | nd                      |            |   |        |
| <b>Acceptor(T<sub>100min</sub>)</b>      | nd                      |            |   |        |
| <b>Daidzein (metabolite)</b>             |                         |            |   |        |
| <b>Donor (T<sub>100min</sub>)</b>        | 572.907                 | 107.626    | 6 | 18.8   |
| <b>Membrane</b>                          | 5.099                   | 0.625      | 6 | 12.3   |
| <b>Acceptor(T<sub>100min</sub>)</b>      | nd                      |            |   |        |
| <b>Sum</b>                               | <b>920.005 (113.4%)</b> |            |   |        |

  

|                                                      | Average (%) | SD (%) | N | CV (%) |
|------------------------------------------------------|-------------|--------|---|--------|
| $Q_{DEP}^a$<br>(daidzein/daidzin T <sub>0min</sub> ) | 0.63        | 0.08   | 6 | 12.2   |
| <b>Metabolite Formation Index (MFI) <sup>b</sup></b> | 71.2        | 13.3   | 6 | 18.7   |

<sup>a</sup> calculated with equation 7, <sup>b</sup> calculated with equation 10.

## 5 Data processing of the metabolite profiling

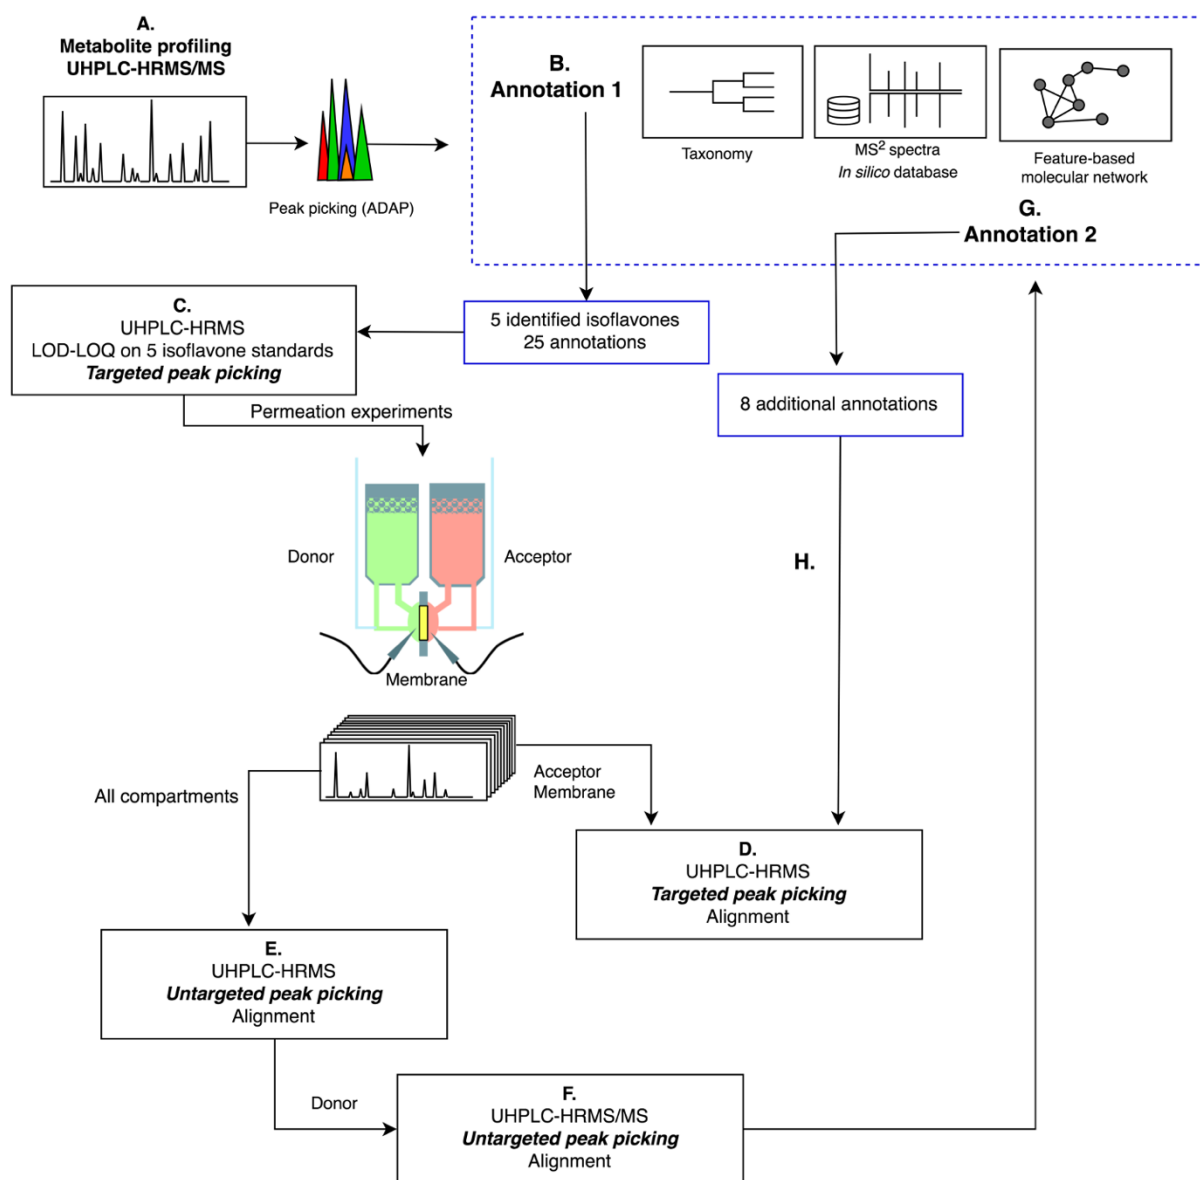

**Supplementary Figure S4.** Scheme of UHPLC-HRMS and HRMS/MS data processing and annotation strategies established to consider detection limits related to both data acquisition and data processing.

## 6 Acquisition of the untargeted UHPLC-HRMS/MS metabolite profiling of PLRE

The analyses were performed on an Acquity UPLC system interfaced to an Orbitrap Q-Exactive Focus mass spectrometer (Thermo Scientific, Bremen, Germany), using a heated electrospray ionization (HESI-II) source. Thermo Scientific Xcalibur 2.1 software was employed for instrument control. An Acquity UPLC PDA detector acquired the UV trace from 200 to 500 nm. The full MS analyses were performed in positive mode with a mass range of 150-1500 at a resolution of 35,000 full width at half maximum (FWHM) (at  $m/z$  200). Diisooctyl phthalate  $C_{24}H_{38}O_4$   $[M+H]^+$  ion ( $m/z$  391.28429) was used as an internal lock mass. The optimized HESI-II parameters were the following: source voltage: 3.5 kV (pos); sheath gas flow rate (N<sub>2</sub>): 52.5 units, auxiliary gas flow rate: 13.75 units, spare gas flow rate: 2.75; capillary temperature: 268.75°C (pos); S-Lens RF Level: 50. The mass analyzer was calibrated according to the manufacturer's directions using a mixture of caffeine, methionine-arginine-phenylalanine-alanine-acetate (MRFA), sodium dodecyl sulfate, sodium taurocholate and Ultramark 1621 in an acetonitrile/methanol/water solution containing 1% acetic acid by direct injection. The data-dependent MS/MS events were performed on the 3 most intense ions detected in full scan MS (Top3 experiment). The MS/MS isolation window width was 1  $m/z$ , and the normalized collision energy (NCE) was 35 units. In data-dependent MS/MS experiment, full scans were acquired at a resolution of 35 000 FWHM (at  $m/z$  200), and MS/MS scans at a resolution of 17 500 FWHM with a maximum injection time of 50 ms. After being acquired in MS/MS scan, parent ions were placed in a dynamic exclusion list for 2.0 seconds.

## 7 MZmine parameters for peak picking

**Table S11:** MZmine parameters for peak-picking

|    |                                                                  | HRMS/MS                       |                                     | HRMS only |
|----|------------------------------------------------------------------|-------------------------------|-------------------------------------|-----------|
|    |                                                                  | High                          | Low                                 | -         |
| 1  | Mass detection                                                   |                               |                                     |           |
|    | Noise level MS1                                                  | 7E4                           | 1E4                                 | 1E4       |
|    | Noise level MS2                                                  | 1                             | 1                                   | NA        |
| 2  | Peak detection -> ADAP chromatogram builder                      |                               |                                     |           |
|    | Min group size in # of scans                                     | 5                             | 5                                   | 15        |
|    | Group intensity threshold                                        | 7E4                           | 1E4                                 | 7E4       |
|    | Min highest intensity                                            | 5E4                           | 2E4                                 | 5E4       |
|    | m/z tolerance [ppm]                                              | 5                             | 5                                   | 5         |
| 3  | Peak detection -> chromatogram deconvolution Wavelets (ADAP)     |                               |                                     |           |
|    | n/z center calculation                                           |                               | MEDIAN                              |           |
|    | S/N threshold                                                    |                               | 10                                  |           |
|    | S/N estimator:                                                   |                               | intensity window SN                 |           |
|    | Min feature height                                               | 7E4                           | 1E4                                 | 7E4       |
|    | Coefficient area threshold                                       |                               | 100                                 |           |
|    | Peak duration range [min]                                        |                               | 0.00- 1.50                          |           |
|    | RT wavelet range [min]                                           |                               | 0.00 – 0.06                         |           |
|    | m/z range for MS2 scan pairing [Da]                              | 0.025                         |                                     | NA        |
|    | RT range for MS2 scan pairing [min]                              | 0.08                          |                                     | NA        |
| 4  | Isotopic peaks grouper                                           |                               |                                     |           |
|    | m/z tolerance [ppm]                                              |                               | 5                                   |           |
|    | Retention time tolerance absolute [min]                          |                               | 0.01                                |           |
|    | Maximum charge                                                   |                               | 2                                   |           |
|    | Representative isotope                                           |                               | Most intense                        |           |
| 5  | Filtering -> Duplicate peak filter                               |                               |                                     |           |
|    | m/z tolerance [ppm]                                              |                               | 1                                   |           |
|    | Retention time tolerance absolute [min]                          |                               | 0.01                                |           |
| 6  | Alignment -> JOIN                                                |                               |                                     |           |
|    | m/z tolerance [ppm]                                              |                               | 5                                   |           |
|    | Weight for m/z [Da]                                              |                               | 1                                   |           |
|    | Retention time tolerance absolute [min]                          |                               | 0.02                                |           |
|    | Weight for RT                                                    |                               | 1                                   |           |
|    | Require same charge state                                        |                               | <input checked="" type="checkbox"/> |           |
|    | Compare isotope pattern ->                                       | 5 ppm<br>1E3<br>Min score 70% | 5 ppm<br>1E2<br>Min score 70%       |           |
| 9  | Identification -> Custom Database, adduct search, complex search |                               |                                     |           |
|    | Retention time tolerance absolute [min]                          | 0.01                          |                                     | 0.05      |
|    | m/z tolerance [ppm]                                              |                               | 5                                   |           |
|    | Max complex/adduct peak height                                   |                               | 10000%                              |           |
| 11 | Filtering -> peak list rows filter                               |                               |                                     |           |
|    | Keep only peaks with MS2 scan (GNPS)                             |                               | <input checked="" type="checkbox"/> |           |
|    | Reset the peak number ID                                         |                               | <input checked="" type="checkbox"/> |           |
|    | Export to .csv                                                   |                               |                                     |           |
|    | Export to .mgf for GNPS                                          |                               |                                     |           |

## 8 Acquisition of the quantitative analyses

The quantitative measurements were performed with a UHPLC system connected with a triple quadrupole (TQ) mass spectrometer operating in multiple reaction monitoring (MRM). The system was equipped with an Acquity UPLC system (Waters, Milford, MA, USA) composed of a binary solvent manager (Class I), a sample manager FL (Class I), and a column manager. This UHPLC system was connected with a triple quadrupole (TQ) mass spectrometer (Waters Xevo TQ-S Micro) equipped with Z-spray® electrospray ionization source (ESI) operating in positive mode. Masslynx V4.1 software was employed for data acquisition, data handling, and instrument control. The nebulizing gas was high purity nitrogen, and the collision gas was high purity argon. The capillary voltage of ESI was set at 3.8 kV, desolvation gas temperature at 350°C, and its gas flow at 650 L/h. Multiple reaction monitoring (MRM) were performed for selective detection and quantification. Cone voltage, and collision energies were optimized for each compound by using the embedded module Intellistart. MRM with the following precursor → product(s)  $m/z$  and cone and collision voltages were the following: puerarin, 417 → 267 + 297, cone voltage 62 V and collision one at 28 V; daidzin, 417 → 91 + 199 + 255 cone voltage 44 V and collision ones at respectively 70, 44 and 16 V; genistin, 433 → 91 + 153 + 271, cone voltage 40 V and collision ones at respectively 66, 48, 28 V; daidzein, 255 → 91 + 137 + 199, cone voltage 68 V and collision ones at respectively 30, 24, 22 V; genistein, 271 → 91, 153, 215, cone voltage 70 V and collision ones at respectively 36, 28, 22 V. The signals were integrated by the Targetlynx module included in Masslynx.
